# Supplementary material
Source: PubMed Central journal article supplement (PMC5741102)
Supplement: NIHMS923082-supplement.pdf [file NIHMS923082-supplement.pdf]

## Supplemental data

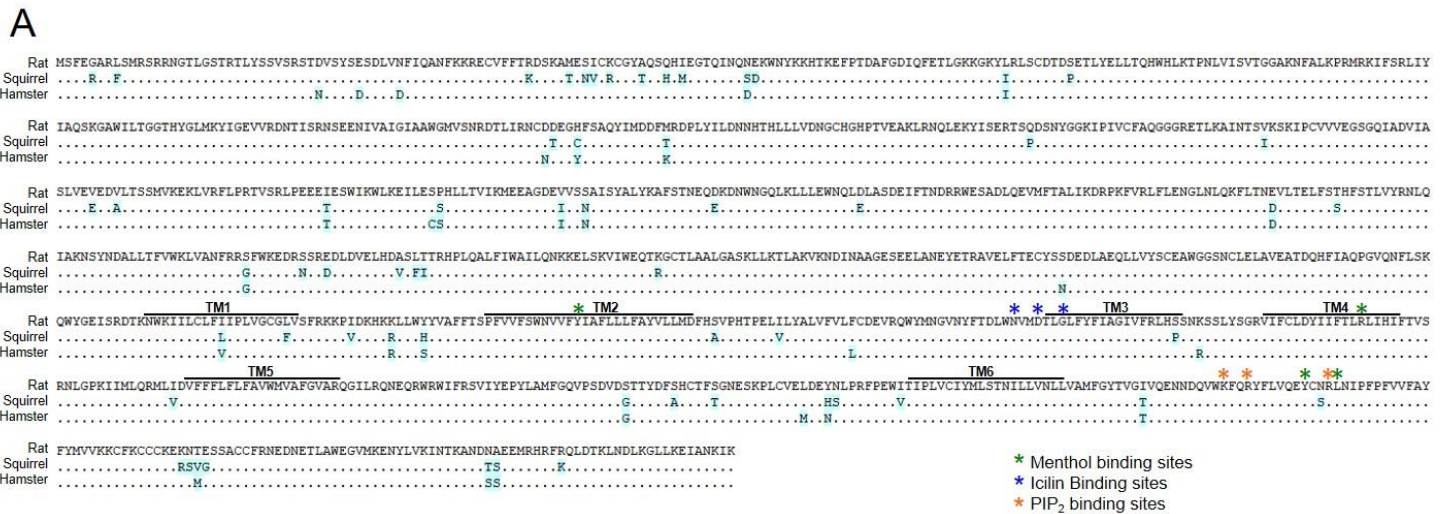

**B**

| Position:      | 726 | 762 | 819 | 927 | 946 | 947 |
|----------------|-----|-----|-----|-----|-----|-----|
| Rat TRPM8      | Y   | S   | S   | S   | Y   | N   |
| Squirrel TRPM8 | H   | A   | P   | A   | H   | S   |
| Hamster TRPM8  | S   | S   | S   | S   | N   | N   |

**Figure S1. (Related to Figure 2)** (A) Amino acid alignment of rat TRPM8 (NP\_599198), squirrel TRPM8 (MF285605) and hamster TRPM8 (MF285606). sqTRPM8 and hamTRPM8 are 94% identical to each other, and 94% and 97% identical to rTRPM8, respectively. Putative transmembrane domains are denoted by black bars. Asterisks denote amino acids involved in sensitivity to menthol (green asterisks), icilin (blue asterisks) and PIP<sub>2</sub> (orange asterisks). (B) Alignment of the six amino acid which modulate cold sensitivity of rat and squirrel TRPM8.

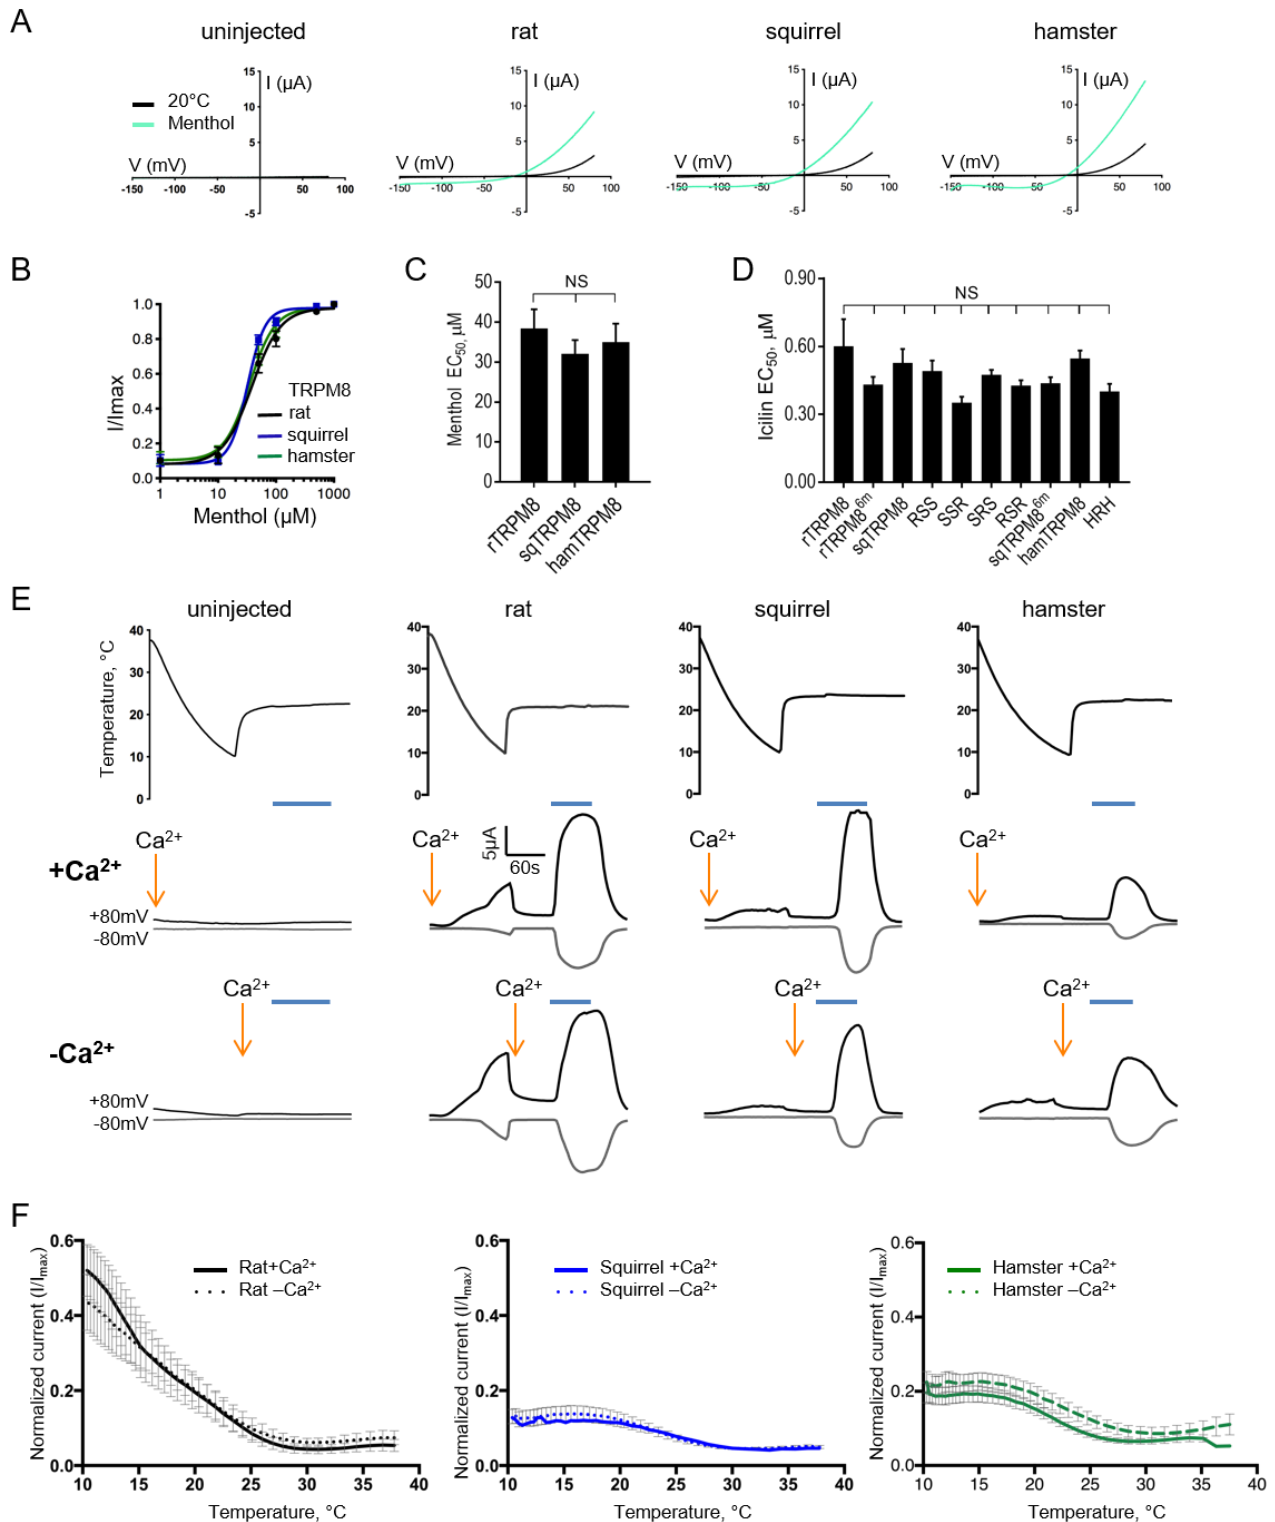

**Figure S2. (Related to Figure 3)** (A) Exemplar current-voltage plots of rat, squirrel and hamster TRPM8 responses to 500  $\mu\text{M}$  menthol recorded at 20°C by two-electrode voltage clamp in *Xenopus* oocytes. (B) Menthol dose-response curves for rat, squirrel and hamster TRPM8 orthologues (mean  $\pm$  SEM,  $n=6$ ) (C, D) Quantification of EC<sub>50</sub> for menthol (C) and icilin (D) (mean  $\pm$  SEM,  $n=5-8$ ; NS, not significant vs. rat TRPM8,  $P \geq 0.05$ , one-way ANOVA with Dunnett's post-hoc test). (E) Exemplar temperature responses of TRPM8 orthologues recorded by two-electrode voltage clamp with or without extracellular calcium. Note that in the no-calcium condition (-Ca<sup>2+</sup>), 1.8 mM calcium was added back to the solution at the end of the temperature ramp (yellow arrow) to record responses to 1  $\mu\text{M}$  icilin (blue bar). (F) Normalized temperature-response profiles recorded with and without extracellular calcium in oocytes expressing TRPM8 orthologues (mean  $\pm$  SEM,  $n \geq 5$ ).

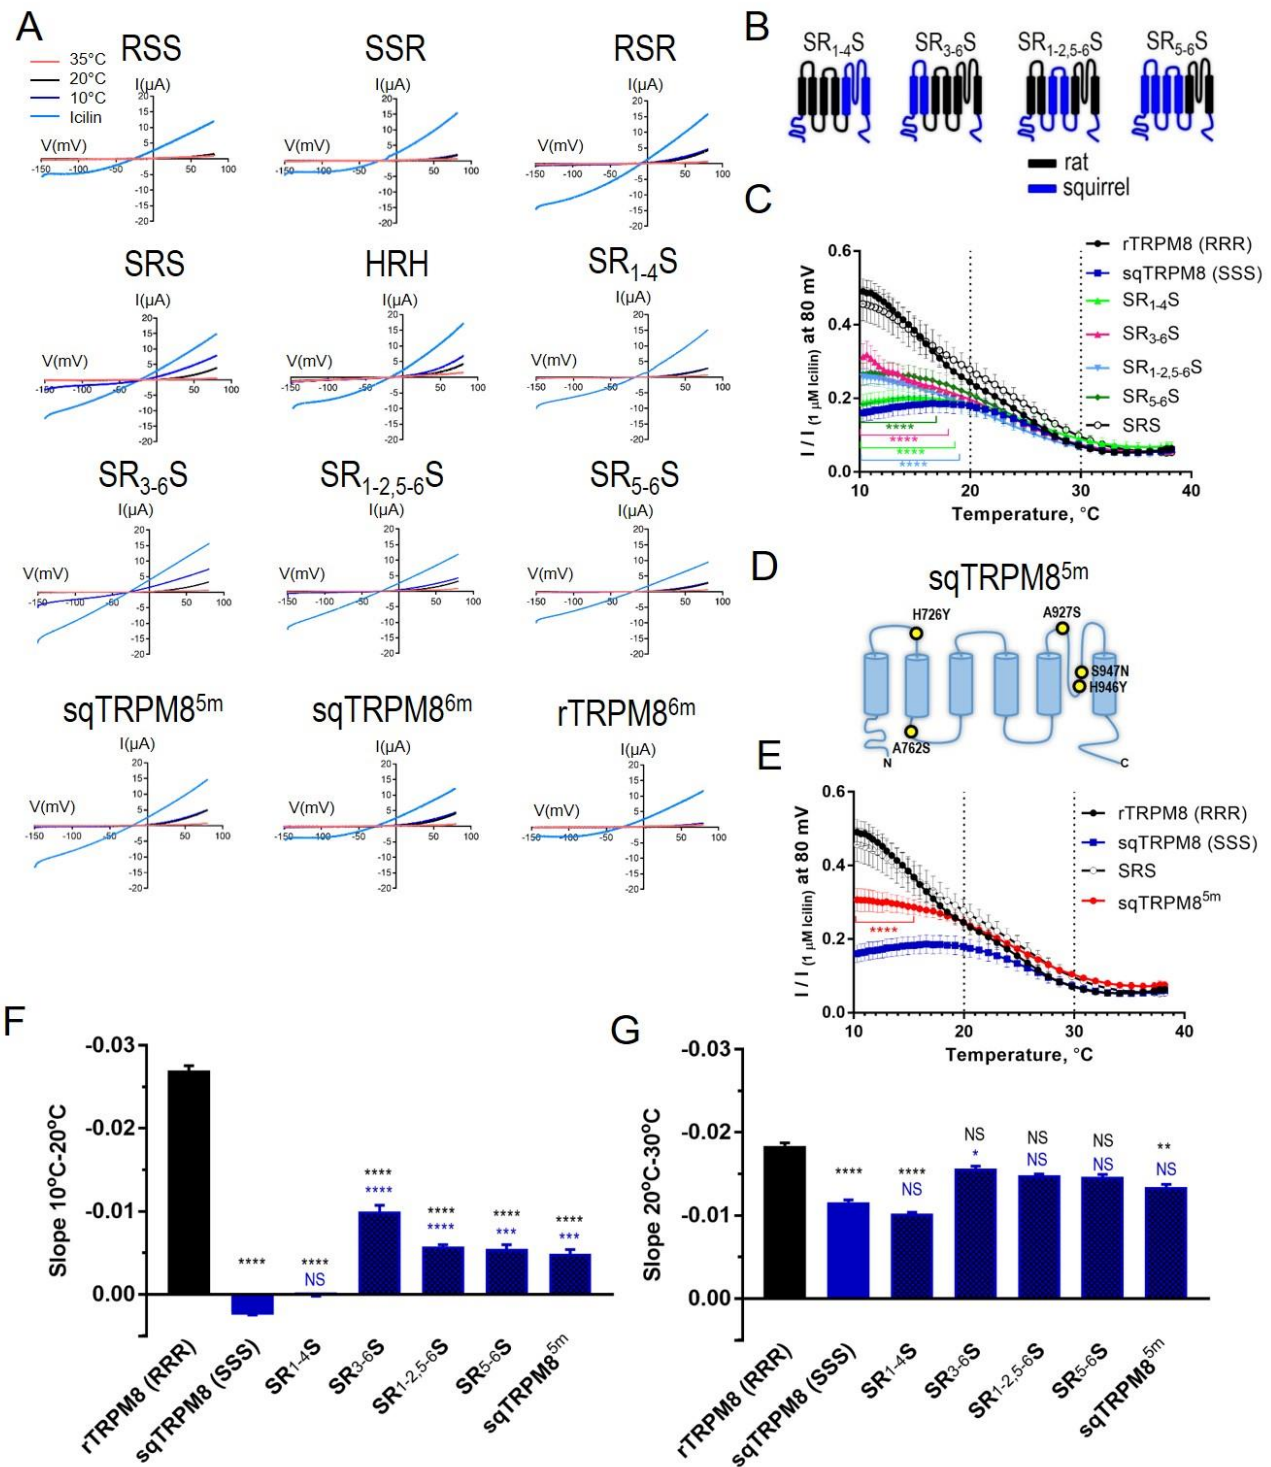

**Figure S3. (Related to Figure 4)** (A) Exemplar current-voltage plots of the indicated TRPM8 chimeras to cold and 1  $\mu$ M icilin recorded by two-electrode voltage clamp in *Xenopus* oocytes. (B) Topology diagram of TRPM8 chimeric channels. (C, E) Normalized temperature response profiles for chimeric channels between squirrel, and rat TRPM8 (mean  $\pm$  SEM,  $n=9-14$ ; \*\*\*\* $0.0001 < P < 0.05$  for data of the same color vs. rat TRPM8, in the range indicated by brackets, not significant ( $P \geq 0.05$ ) outside this range, two-way ANOVA with Dunnett's post-hoc test. (D) Topology diagram depicting the locations of the five mutations in sqTRPM8 (yellow circles, sqTRPM8<sup>5m</sup>). (F, G) Quantification of temperature response steepness (slope) obtained by fitting the data for the 10°C-20°C and 20°C-30°C segments in (C) and (E) to the linear equation (mean  $\pm$  SEM,  $n=9-14$ ). NS, not significant,  $P \geq 0.05$ , \* $P < 0.05$ , \*\* $P < 0.01$ , \*\*\*\* $P < 0.0001$  vs. rTRPM8 (denoted by black symbols) or sqTRPM8 (denoted by blue symbols), one-way ANOVA with Dunnett post-hoc test.

**Supplemental Experimental Procedures  
Resource Table**

| REAGENT OR RESOURCE                                                | SOURCE                               | IDENTIFIER |
|--------------------------------------------------------------------|--------------------------------------|------------|
| <b>Biological samples</b>                                          |                                      |            |
| <i>Xenopus laevis</i> oocytes                                      | Nasco                                |            |
| <b>Deposited Data</b>                                              |                                      |            |
| Thirteen-lined ground squirrel TRPM8 (sqTRPM8)                     | GeneBank                             | MF285605   |
| Syrian hamster TRPM8 (hamTRPM8)                                    | GeneBank                             | MF285606   |
| Thirteen-lined ground squirrel TRPA1 (sqTRPA1)                     | GeneBank                             | MG012465   |
| <b>Experimental Models: Organisms</b>                              |                                      |            |
| Thirteen-lined ground squirrel: <i>Ictidomys tridecemlineatus</i>  | University of Wisconsin at Oshkosh   |            |
| Syrian hamster: <i>Mesocricetus auratus</i>                        | Charles River Laboratory             | 049        |
| Domestic mouse: <i>Mus musculus</i> (C57BL/6) wild-type            | Charles River Laboratory             | 027        |
| Domestic mouse: <i>Mus musculus</i> (C57BL/6) TRPM8 <sup>-/-</sup> | Dr. Sven-Eric Jordt, Duke University |            |
| <b>Oligonucleotides</b>                                            |                                      |            |
| sqTRPM8 cloning FWD CCAGGCAAGATGTCCTTCGAG                          | This paper                           |            |
| sqTRPM8 cloning Rev GATGTCCTTCGAGCGTGC                             | This paper                           |            |
| hamTRPM8 cloning FWD ATGTCCTTCGAGGGAGCCAG                          | This paper                           |            |
| hamTRPM8 cloning Rev TTATTTGATTTTATTAGCAA                          | This paper                           |            |
| sqTRPA1 cloning FWD TGTCCTGAGCAGATACAGACAC                         | This paper                           |            |
| sqTRPA1 cloning REV ACGGAGTGGCATCAATCAGA                           | This paper                           |            |
| RNA <i>in situ</i> probe amplification primers:                    |                                      |            |
| TRPM8 FWD CATGAGGAGCAGGAGGAATG                                     | This paper                           |            |
| TRPM8 Rev GTAGGCAAAGACGACGAAGG                                     | This Paper                           |            |
| <b>Recombinant DNA</b>                                             |                                      |            |
| Rat-TRPM8-pMO                                                      | Dr. David Julius's lab (UCSF)        |            |
| Squirrel-TRPM8-pMO                                                 | This paper                           |            |
| Hamster-TRPM8-pMO                                                  | This paper                           |            |
| Squirrel-TRPA1-pMO                                                 | This paper                           |            |
| <b>Software and Algorithms</b>                                     |                                      |            |
| Prism 7                                                            | Graph pad                            |            |
| ImageJ                                                             | NIH                                  |            |
| Pclamp                                                             | Molecular Devices                    |            |

## Contact for Reagent and Resource Sharing

Further information and requests for resources and reagents should be directed to Elena Gracheva (elena.gracheva@yale.edu) and Sviatoslav Bagriantsev (slav.bagriantsev@yale.edu).

## Experimental Model and Subject Details

**Calcium imaging.** Primary neurons were dissected from 3 active squirrels (~1 year old) and 3 mice (8-14 weeks old). Animals were euthanized via CO<sub>2</sub> inhalation followed by decapitation. Dorsal root ganglia were dissected into ice-cold phosphate buffered saline. Tissue was then briefly treated with collagenase P (1mg/mL in HBSS, 15 min, 37°C) followed by 0.25% trypsin (10 min, 37°C). Finally, tissue was suspended in DMEM complete media supplemented with 10% FBS and penicillin/streptomycin and mechanically dissociated using a plastic tipped pipette before being plated on BD Matrigel™ coated coverslips and incubated at 37°C. After neurons were adherent (~2hrs), coverslips were loaded with 10 μM Fura 2-AM (Invitrogen) and 0.02% Pluronic F-127 for 1 hour at 37°C. Images were obtained using Axio-Observer.Z1 inverted microscope (Zeiss) equipped with an Orca-Flash4.0 camera (Hamamatsu) using MetaFluor software (Molecular Devices). For loading and imaging, cells were maintained in physiological Ringer's solution (pH 7.4) containing (in mM): 140 NaCl, 5 KCl, 10 HEPES, 2 CaCl<sub>2</sub>, 2 MgCl<sub>2</sub>, and 10 D-glucose. Cold ramps were applied using the SC-20 in-line heater-cooler and CL-200A Bipolar Temperature controller (Warner), with bath temperature monitored via a thermistor situated in the imaging chamber. At the end of imaging, neurons were differentiated from other cell types based on their responses to high K<sup>+</sup> Ringer's solution containing (in mM): 10 NaCl, 135 KCl, 10 HEPES, 2 CaCl<sub>2</sub>, 2 MgCl<sub>2</sub> and 10 D-glucose. Images were sampled at 1 Hz with 25 ms exposure time at 340 nm and 50 ms at 380 nm. The ratioed traces from all icilin-responding neurons were combined by binning per 1 degree °C and averaging.

**Electrophysiology.** Neurons were loaded with Fura-2AM at 37°C as described above approximately 1 hour before imaging and recording. Neurons with increased intracellular calcium in response to 10 μM icilin were selected for recording. The internal pipette solution consisted of (in mM): 140 CsCl, 2 Mg-ATP, 10 HEPES, 1 EGTA (pH 7.4 with CsOH). External solution contained (in mM): 140 NaCl, 3 KCl, 10 HEPES, 2 CaCl<sub>2</sub>, 1 MgCl<sub>2</sub>, 10 glucose (pH 7.4 with NaOH). Neurons were held at -60mV in voltage clamp mode while temperature was decreased from 32.3±0.3°C (mean±SEM, n=9, range 30-33°C) to 11.5±0.4°C, range, 10-14°C) and back, followed by application of 10 μM icilin. Electrophysiology data were converted from Pclamp format using Taro Tools (Dr. Taro Ishikawa, <https://sites.google.com/site/tarotoolsregister/>). Neuronal recording and imaging data was analyzed using custom routines written in Igor Pro 6.3 (Wavemetrics, Oswego CA).

**Cloning, gene synthesis, mutagenesis, plasmids.** Rat *Trpm8* was provided by Dr. David Julius, University of California, San Francisco. The squirrel *Trpm8* orthologue was cloned from cDNA from dorsal root ganglia using the following primers: forward 5'- CCAGGCAAGATGTCCTTCGAG -3'; reverse 5'- GATGTCCTTCGAGCGTGC - 3'. The squirrel *Trpa1* orthologue was cloned from cDNA from dorsal root ganglia using the following primers: forward 5'- TGTCCTGAGCAGATACAGACAC -3'; reverse 5'- ACGGAGTGGCATCAATCAGA - 3'. Hamster *TRPM8* was cloned from cDNA from dorsal root ganglia using following primers: forward 5'- ATGTCCTTCGAGGGAGCCAG-3'; reverse 5'- TTATTTGATTTTATTAGCAA - 3'. The TRPM8 orthologues were cloned into the pMO vector. Point mutations and chimeric channels were generated using the QuickChange Site-Directed mutagenesis kit (Agilent) and overlapping PCR. All constructs were verified by full-length sequencing.

**Squirrel TRPM8.** The protein sequence of squirrel TRPM8 that we cloned from squirrel dorsal root ganglia is shown below and was deposited to GeneBank under the accession number MF285605.

```
MSFERARFSMRSRRNGTLGSTRTLYSSVSRSTDVSYSESDLVNFIQANFKKRECVFFTKD
SKATENVCRCGYQTQSHHMEGTQINQSEKWNYYKKHTKEFPTDAFGDIQFETLGKKGKYIRL
SCDTPETLYELLTQHWHLKTPNLVISVTGGAKNFALKPRMRKIFSRLIYAQSKGAWIL
TGGTHYGLMKYIGEVVRDNTISRNSEENIVAIGIAAWGMVSNRDTLIRNCDTEGCFSAQY
IMDDFTRDPLYILDNNHHTLLLVDNGCHGHPTVEAKLRNQLKYEISERTSPDSNYGGKIP
IVCFAQGGGRETLCINTSIKSKIPCVVVEGSGQIADVIASLVEEEDALTSSMVKEKLV
FLPRTVSRPPEEETESWIKWLKEILESHLLTVIKMEEAGDEIVSNAISYALYKAFSTNE
QEKDNWNGQLKLLLEWNQLELASDEIFTNDRRWESADLQEVMTALIKDRPKFVRLFLEN
GLNLQKFLTNDVLTFLFSSHFTLVYRNLQIAKNSYNDALLTFVWKLVANFRRGFWKEDR
NSRDDLDVELHDVFSITRHPQLALFIWAILQNKKELSKVIWEQTRGCTLAALGASKLLKT
LAKVKNDINAAGESEELANEYETRAVELFTECYSSDEDLAEQLLVYSCEAWGGSNCLELA
VEATDQHFIAPQGVQNFSLKQWYGEISRDTKNWKIILCLFLIPLVCGFVSVFRKKPVDKH
KRLLLWHYVAFFTSPFVFSWNVVFYIAFLLLFAVLLMDFHAVPHTPELVLYALVFLVFC
DEVRQWYMNQVYFTDLWNVMDTLGLFYFIAGIVFRLHPSNKSSLYSGRVIFCLDYIIFT
LRLIHIFTVSRNLGPKIIMLQRMVLDVFFFLFAVVMVAFGVARQGILRQNEQRWRWIF
RSVIYEPYLAMFGQVPSDVGTTYDFAHCTFTGNESKPLCVELDEHSLPRFPEWVTIPLV
```

CIYMLSTNILLVNLLVAMFGYTVGTVQENNDQVWKFRYFLVQEYCSRLNIPFPFVVFAY  
FYMVVKKCFKCCCKERSVGSSACCFRNETLAWEGVMKENYLVKINTKANDTSEEMRH  
RFKQLDTKLNDLKGLLKEIANKIK

**Hamster TRPM8.** The protein sequence of hamster TRPM8 that we cloned from hamster dorsal root ganglia is shown below and was deposited to GeneBank under the accession number MF285606.

MSFEGARLSMRSRRNGTLGSTRTYSSVSRSTNVSYSDSDLVDFIQANFKKRECFFTRD  
SKAMESICKCGYAQSQHIEGTQINQDEKWNYYKHTKEFPTDAFGDIQFETLGKKGKYIRL  
SCDTDSETLYELLTQHWHLKTPNLVISVTGGAKNFALKPRMRKIFSRLIYAQSKGAWIL  
TGGTHYGLMKYIGEVVRDNTISRNEENIVAIGIAAWGMVSNRDTLIRNCNDEGYFSAQY  
IMDDFKRDPLYILDNNHHTLLLVDNGCHGHPTVEAKLRNLEKYISERTSQDSNYGGKIP  
IVCFAQGGGRETAKINTSVKSKIPCVVVEGSGQIADVIASLVEVEDVLTSSMVKEKLV  
FLPRTVSRPPEETESWIKWLKEILECSHLLTVIKMEEAGDEIVSNAISYALYKAFSTNE  
QDKDNWNGQLKLLLEWNQLDLASDEIFTNDRRWEADLQEVMTALIKDRPKFVRLFLEN  
GLNLQKFLTNDVLTSTHSTLVYRNLQIAKNSYNDALLTFVWKLVANFRRGFWKEDR  
SSREDLDVELHDASLTTRHPLQALFIWAILQNKKELSKVIWEQTKGCTLAALGASKLLKT  
LAKVKNNDINAAGESEELANEYETRAVELFTECYSNDEDLAEQLLVYSCEAWGGSNCLELA  
VEATDQHFIAPQGVQNFSLKQWYGEISRDTKNWKIILCFVIPLVGCVLVSFRKKPIDKH  
KRLWSYVAFFTSFVVFVSWNVVFIYIAFLLLFAYVLLMDFHVPHTPELILYALVFVLLC  
DEVQRWYMNGVNYFTDLWNVMDTLGLFYFIAGIVFRLHSSNRSSLYSGRVIFCLDYIIFT  
LRLIHIFTVSRNLGPKIIMLQRMILIDVFFFLFLFAVWMVAFGVARQGILRQNEQRWRWIF  
RSVIYEPYLAMFGQVPSVDGTTYDFSHCTFSGNESKPLCVEMDENNLPRFPEWITIPLV  
CIYMLSTNILLVNLLVAMFGYTVGTVQENNDQVWKFRYFLVQEYCNRLNIPFPFVVFAY  
FYMVVKKCFKCCCKEKNMESSACCFRNETLAWEGVMKENYLVKINTKANDSSEEMRH  
RFRQLDTKLNDLKGLLKEIANKIK

**Squirrel TRPA1.** The protein sequence of squirrel TRPA1 that were cloned from squirrel dorsal root ganglia is shown below and was deposited to GeneBank under the accession number MG012465.

MKRSLRKMLRPGEKEPQDVVYQGVEDDMDESKDSFKVVFEGNAHRLQNFIKRRRKLKSKYDD  
TNASPLHHAAEGQVELMKTIISSCAVLNVMDYDNTPLHWATEKNQVESVKFLLSQA  
NPNLRNGNMMAPLHIAAQGMYNEIKVLTEHRSTNINLEGENGNTALLTCAKDNSEALQILL  
NKGAKLCKSNKWGDFPVHQAASFAGAKKCEIILKHGEEHGYSRQSHINFNKVKVSPHLAV  
QSGDLEMIMKCLDNGAHIELVENGKCMALHFAATQGATEIVKLMISSYSGDSNIVNALDNC  
ETLLHRAFLDHHELAEYLISAGADINSTDSEGRSPLILATASASWNIVNLLLSK GARVDIKDHL  
GRNFLHLTVQQPYGLKNLQPEFMQMHIKELVMDEDNDGCTPLHYACRQGVPSVNNLLGF  
NVSIIHKS KDKSPLHFAASYGRINTCQRLQDISDTRLLNEGDLHGMPHLA AKNGHDKV  
VQLLLKKGALFLSDHNGWTALHASMGGYTQTMKVILDTNLKCTDRLDEEGNTALHFAARE  
GHAKAVALLSHDAEILNKQASFLHIALHNKRKEVLTTRSKRWDECLQVFTHHSPSNRC  
PTMEMVEYLPECMKVLLDFCMIPSTEDKSCRDYHIEYNFRYLQCPLELTKHTTPIQGVIEPLS  
VLNVMVQHNRIELLNHPVCKEYLLMKWCAYGFRAHMMNLGSYCLGLIPMTLLVVNVKPGM  
AFNSTGIINETS DHLEILDSTNSYAIQVCMILVFLSSIFGYCKEVVQIFQQRNYFLDYNNALEW  
LIYTTSIIFVLPLFVNVPANVQWQCGAIAIFYWMNFLLYLQRFENCGIFIVMLEVILKTLLRST  
VVVFVLLAFGLSFYVLLNIQDAFSSPLLSIIQTFSMMLGDIN YRDAFLEPFLRNELAYPFLSFAQ  
LIVFTMFVPIVLMNLLIGLAVGDIAEVQKHASLKRIAMQVELHTSLEKKLPLWFLRKVDQKSTI  
VYPNRPRGGKILRLFHYLFGSHEIRQEISNTDTCLEIEMLKQKYRLKDLTSLLEKQHELIKLIQK  
MEISETEDDNHCSFQDKFKKERLELMSSRWNSVLRAVKTKTCLEPRP

**RNA *in situ* hybridization.** Dorsal root ganglia were dissected and fixed overnight in 4% paraformaldehyde in phosphate buffered saline. RNA *in situ* hybridization was performed on cryostat sections (12  $\mu$ m) using digoxigenin-labelled cRNA probes generated by T7/T3 *in vitro* transcription reaction using *Trpm8* cDNA. Signal was developed with alkaline phosphatase-conjugated anti-digoxigenin Fab fragments according to the manufacturer's instructions (Roche).

**Oocyte electrophysiology.** Oocytes were purchased from Nasco and maintained at 18°C in ND96 media containing (mM): 2 KCl, 96 NaCl, 20 MgCl<sub>2</sub>, 1.8 CaCl<sub>2</sub>, 5 HEPES/NaOH pH 7.4 and supplemented with penicillin/streptomycin. cRNA was synthesized by *in vitro* transcription from TRPM8- or TRPA1-containing pMO plasmids linearized with, respectively, *SwaI* or *PmeI* using the mMessage mMachine kit (Ambion), and 2-10 ng RNA was injected per oocyte. Electrophysiological recording were performed by two-electrode voltage clamp (TEVC) 1-4 days post-injection using the OC-725 amplifier. Whole-cell currents were elicited by 3 s voltage ramp from -150 to +90 mV from a holding potential of -80 mV in ND96 pH 7.4 (NaOH), filtered at 1 kHz, sampled at 5 kHz using the Digidata 1440 digitizer and recorded in pCLAMP 10.3 software

(Molecular Devices). Oocytes that displayed currents in excess of 20  $\mu$ A at 80 mV were discarded from analysis. Cold ramps were applied using the SC-20 in-line heater/cooler and CL-100 Temperature controller (Warner), with bath temperature monitored via a thermistor situated adjacent to the oocyte. Icilin (Sigma-Aldrich) was dissolved in DMSO for a stock concentration of 100 mM, stored at  $-20^{\circ}\text{C}$  and diluted to the working concentration prior to experiment. To obtain dose-response curves for icilin, whole-cell currents were measured at 80 mV were fitted to a modified Hill equation:  $I = I_{\min} + (I_{\max} - I_{\min}) / (1 + ([C]_{1/2} / [C])^H)$ , where  $I_{\min}$  and  $I_{\max}$  are the minimal and maximal current values, respectively,  $[C]_{1/2}$  is the half-maximal effective concentration of icilin ( $EC_{50}$ ), and  $H$  is the Hill coefficient. Cold responses were recorded from TRPM8-injected oocytes that were exposed to temperature range from  $37^{\circ}\text{C}$  to  $10^{\circ}\text{C}$  in the presence or absence of 1.8mM  $\text{CaCl}_2$ . Recordings at temperatures below  $10^{\circ}\text{C}$  were unstable due to frequent background leak and were not included in the analysis. After cold exposure, the bath was perfused with  $\text{Ca}^{2+}$ -containing ND96 medium at room temperature, followed by icilin (1 $\mu$ M) in the presence of  $\text{Ca}^{2+}$ . Cold responses were normalized using maximum icilin value.
